# 1 **Estimating probabilistic dark diversity based on the hypergeometric distribution**

2

3 Carlos P. Carmona<sup>1\*</sup>, Robert Szava-Kovats<sup>1</sup>, Meelis Pärtel<sup>1</sup>

4

5 <sup>1</sup> *Institute of Ecology and Earth Sciences, University of Tartu, Tartu, Estonia*

6

7 \* Corresponding author: [perezcarmonacarlos@gmail.com](mailto:perezcarmonacarlos@gmail.com) telephone: +372 55917402

## 8 **Abstract**

- 9 1. The biodiversity of a site includes the absent species from the region that are theoretically  
10 able to live in the site's particular ecological conditions. These species constitute the dark  
11 diversity of the site. Unlike present species, dark diversity is unobservable and can only be  
12 estimated. Most existing methods to designate dark diversity act in a binary fashion.  
13 However, dark diversity is more suitably defined as a fuzzy set—in which the degree of  
14 certainty about species membership is expressed as a probability.
- 15 2. We present a new method to estimate probabilistic dark diversity based on the  
16 hypergeometric distribution. The method relies on co-occurrences to infer the strength of the  
17 association between pairs of species and assign probabilistic adscription to dark diversity to  
18 absent species. We compare it with two established methods to estimate dark diversity (Beals  
19 index and favorability correction). To test the methods, we created simulations based on  
20 individual agents in which the suitability of each species in each site is known. We compared  
21 the ability of the methods to accurately predict suitability and the size of dark diversity, and  
22 compared their sensitivity to data availability. Further, we assessed the methods in two real  
23 datasets with nested sampling designs.
- 24 3. Our simulations revealed that predictions of the Beals method were extremely sensitive to  
25 species frequency, and predicted suitability poorly. The Favorability transformation corrected  
26 this relationship, but did still predicted extremely low probabilities for species with very little  
27 information. The Hypergeometric method outperformed the Beals and Favorability methods  
28 in all considered aspects in the simulations and displayed better characteristics in the real  
29 datasets.
- 30 4. Probabilistic consideration of biodiversity will help to acknowledge the uncertainty  
31 associated with ecological information. Although the Beals method has been described as the  
32 best estimator of dark diversity, it should be preferred only when the goal is to predict future  
33 appearances of species. However, studies on dark diversity should focus on the ecological  
34 affinities of species. The Hypergeometric method is the most promising method to estimate  
35 probabilistic dark diversity and species pool composition based on co-occurrences.

## 36 **Introduction**

37 The biodiversity of a site consists not only of those species actually present, but also of absent species  
38 from the region that are theoretically able to live in the site's particular ecological conditions (its dark  
39 diversity; Pärtel, Szava-Kovats, & Zobel, 2011). Unlike present species, dark diversity is, by definition,  
40 unobservable and must be estimated. The increasing recognition of the importance of considering absent  
41 species (Bennett & Pärtel, 2017; de Bello et al., 2012; Pärtel et al., 2011) has recently seen the  
42 development of methods to estimate the size and composition of dark diversity (de Bello et al., 2016;  
43 Karger et al., 2016; Lewis, Szava-Kovats, & Pärtel, 2016), although ample room remains for  
44 methodological improvements. Methods to estimate dark diversity include the use of indicators of the  
45 position of species' niches along environmental gradients (de Bello et al., 2016; Lewis et al., 2017),  
46 species distribution modelling (Estrada, Barbosa, & Real, 2018; Ronk, de Bello, Fibich, & Pärtel, 2016),  
47 regional surveys of the habitat of interest (Jiménez-Alfaro et al., 2018), or species co-occurrence  
48 patterns (Brown et al., 2019; de Bello et al., 2016; Lewis et al., 2016).

49 Many of these methods designate dark diversity in a binary fashion, i.e., any given species either  
50 belongs (1) or does not belong (0) to local dark diversity. However, binary classification requires  
51 establishing thresholds to define which species are included in dark diversity. Despite efforts to make  
52 this procedure as aseptic as possible, the selection of thresholds remains rather arbitrary (Karger et al.,  
53 2016), can affect the results (Lewis et al., 2016), and is often difficult to justify. By contrast, dark  
54 diversity is more suitably defined as a fuzzy set—in which the degree of certainty about species  
55 membership is expressed as a probability—rather than as a binary designation. In other words, the  
56 probability of a species passing through all the different ecological filters ultimately determines the  
57 probability that the species is part of the dark diversity of a given site.

58 Although the justification for probabilistic approaches to dark diversity is long recognized (e.g.  
59 Mokany & Paini, 2011; Pärtel, Zobel, Zobel, van der Maarel, & Pärtel, 1996), methods adopting this  
60 approach are only recently being developed (Karger et al., 2016; Lessard et al., 2016; Real, Márcia  
61 Barbosa, & Bull, 2017). Species co-occurrence patterns offer a pragmatic method for the probabilistic  
62 approach. Species that frequently co-occur share similar ecological requirements (integrating both  
63 abiotic and biotic conditions). Imagine we are interested in the status of a particular species that has not  
64 been observed in a community. The presence of other species that tend to be found together with this  
65 species suggests that the probability of membership in local dark diversity is high. The most widely  
66 used method to estimate dark diversity based on co-occurrence patterns is the Beals index (Beals, 1984;  
67 Ewald, 2002). Evidence suggests that estimations of dark diversity based on the Beals index have  
68 greater predictive ability than relying on databases with habitat requirements of species (de Bello et al.,  
69 2016; Lewis et al., 2016). This method assigns to each species and site the probability of the species  
70 being present, which is computed by combining information on the identity of the species actually found  
71 in the community (observed diversity) and their patterns of co-occurrence with the focal species.  
72 However, Beals values increase monotonically with the frequency of the species in the region (De

73 Cáceres & Legendre, 2008; Lewis et al., 2016; Münzbergová & Herben, 2004). This is problematic,  
74 because the fact that a species is rarely observed in a set of communities is not necessarily an indicator  
75 that the species is not part of the dark diversity of some sites, particularly if dispersal limitation plays a  
76 role (Jiménez-Alfaro et al., 2018; Riibak et al., 2015). Actually, the probability that a species will appear  
77 in a site where it is currently absent depends on a combination of the suitability of the local conditions  
78 and factors related to dispersal, including regional frequency and dispersal ability. Accordingly, Beals  
79 values have been used in studies aiming to predict species appearances in the near future without  
80 distinguishing habitat suitability per se (Karger et al., 2016). However, when studying dark diversity  
81 we are interested only on species suitability. One way to resolve this issue is to apply species-specific  
82 thresholds (Münzbergová & Herben, 2004), resulting in a binary classification of species. Although  
83 such a classification is independent of species frequency, it lacks the preferred notion of dark diversity  
84 in probabilistic terms.

85 One alternative is to transform indices affected by species frequency (such as Beals) into pure  
86 indicators of the suitability of the local conditions for each particular species (Favorability; Real,  
87 Barbosa, & Vargas, 2006). The favorability transformation provides information on the likelihood of a  
88 species to be found in a site with respect to random expectations (i.e. regardless of its presence/absence  
89 ratio in the dataset; Real et al., 2006). This solution—which has been applied to logistic regressions in  
90 the context of species distribution modelling (Olivero et al., 2017; Real et al., 2017)—could also be  
91 applied to estimate probabilistic dark diversity from the Beals index. Alternatively, rather than solving  
92 the issue of frequency with post-hoc transformations, we propose that species suitability in a site can  
93 be estimated directly by comparing the realised co-occurrence patterns of each pair of species to that  
94 expected under the assumption of their complete lack of association. The degree to which the observed  
95 co-occurrence between a pair of species departs from random association can be then used as the  
96 indicator value for that pair of species. Associations between pairs of species can be analysed using the  
97 hypergeometric distribution (Griffith, Veech, & Marsh, 2016).

98 In this paper, we advance towards the establishment of methods to estimate probabilistic dark  
99 diversity using species co-occurrence matrices. We first present a novel method based on the  
100 hypergeometric probability distribution to assign probabilistic estimates of dark diversity. We test this,  
101 along with raw Beals values and its transformation into favorability, in a simulated dataset created  
102 through individual-based modelling, resulting into communities with known observed and dark  
103 diversity. We subsequently compare the different methods using a real dataset with a nested sampling  
104 structure (Lewis et al., 2016). This comparison allows us to distinguish features of these methods,  
105 including their probabilistic distributions, their ability to estimate accurately the ecological suitability  
106 of sites for species, or their dependence on the amount of data available.

107

108 **Simulations and dark diversity estimations**

109 Comparing the performance of methods to estimate dark diversity is challenging because dark diversity  
110 is not observable in natural conditions. Some studies have used datasets with nested hierarchical  
111 sampling designs, where vegetation is sampled in a small plot that is contained within a larger plot  
112 (Brown et al., 2019; de Bello et al., 2016; Lewis et al., 2016). In these studies, the information from the  
113 smaller plot is used to build a species x species co-occurrence matrix, and the estimations of dark  
114 diversity made from the smaller plots are confronted with the species present in the larger plots. It is  
115 unclear, however, to what point species in the larger plot reflect the true dark diversity of the smaller  
116 plot. Species whose ecological requirements match those of the site are not necessarily present in the  
117 surroundings. This can happen, for example, when a species has been unable to disperse to a favourable  
118 site, which is more likely the case for regionally rare species. As a result, considering that the dark  
119 diversity of the small plot can be derived from the species present in the surroundings likely favours  
120 methods whose predictions reflect species frequency. However, as discussed above, these methods do  
121 not necessarily reflect better the suitability of species. Simulations which assign the match between the  
122 ecological requirements of species and the environmental characteristics of sites are a valuable  
123 alternative in this case (Lewis et al., 2016). In short, we created a virtual landscape containing different  
124 habitats and a set of species with different suitability for these habitats and allowed communities to  
125 develop following simple rules for a period of time (see below). Finally, we sampled the communities  
126 and used the co-occurrence pattern of species to estimate dark diversity with the different methods,  
127 which we finally compared with species suitability.

128 Simulations were based on Jöks & Pärtel (2019), with the difference that our agents represented  
129 individuals of a species rather than populations. We created a 100 x 100 grid divided into 100 plots  
130 (each encompassing 10 x 10 cells); cells could either contain an individual or be empty. Individuals  
131 acted according to simple rules that corresponded to some of the basic processes that determine diversity  
132 (selection, drift, and dispersal; see below and Vellend, 2010). Among these processes, selection  
133 depended on the suitability of each species to each plot. For this, we assigned the same value for  
134 environment to all the cells in the same plot, which was drawn from a normal distribution with  $\mu=0$  and  
135  $\sigma=5$ . We then created a set of 100 species, with each species having an optimal value in the environment  
136 drawn from a uniform distribution from -10 to 10; all individuals of a species had the same value (i.e.  
137 there was no intraspecific variability). Once these values were assigned, we estimated the distance  
138 between each community's environment and each species optimum, considering the environment as a  
139 circular variable. Suitability indicates how close an environment is to the optimum of a given species;  
140 suitability was 1 when the environment value in the plot was equal to the species optimum and decreased  
141 towards 0 as distance increased (following a normal distribution).

142 Simulations started with an empty grid (no individuals present), and were run for 5250 sequential  
143 cycles. In each cycle, the following processes (and sub-processes) took place:

144           **Dispersal.** Species were added to communities through dispersal (Vellend, 2010), which had two  
145 sources in our simulation: immigration from the region and reproduction. Immigration simulated the  
146 arrival to the grid of individuals belonging to species from outside the landscape. In each cycle, each  
147 cell had a 10% probability of receiving an individual from a randomly selected species from the region.  
148 Established individuals (see “Selection” below) had a 40% probability of reproducing; reproducing  
149 individuals created a propagule which was dispersed in a random direction at a distance that was chosen  
150 from a log-normal distribution with a mean value of 10% the maximum distance between cells in the  
151 grid. All species had similar dispersal abilities. To avoid edge effects, we set periodic boundary  
152 conditions in the grid; this way, when a propagule reached the boundaries of the grid, its dispersal  
153 continued from the opposite side. When individuals from more than one species arrived at the same cell  
154 in a cycle, the retained species was randomly selected among the arriving species.

155           **Selection.** This category included processes regulating interactions between species and of  
156 species with their environment. We considered two main selection sub-processes, both related with  
157 suitability: establishment and competition. Establishment decided whether a propagule arriving to a cell  
158 formed an adult individual or died. The probability that a propagule established in a cell was equal to  
159 the suitability of the species in the corresponding plot. Competition took place when an individual was  
160 able to establish in a cell previously occupied by another individual (the “local” individual). In this case,  
161 the difference in competitive abilities between the arriving and the local individuals was estimated as  
162 their difference in suitability ( $\text{Diff}_{\text{Suit}} = \text{suitability}_{\text{local}} - \text{suitability}_{\text{dispersed}}$ ). The probability that the local  
163 would persist was estimated as the logistic function of  $\text{Diff}_{\text{Suit}}$ . Through the combined effect of  
164 establishment and competition, species with higher suitability for a given plot should be more frequent  
165 and abundant in this plot.

166           **Drift.** This category included processes that randomly changed species abundances (Vellend,  
167 2010). We incorporated it in the simulations by including mortality: in each cycle, each individual had  
168 a fixed 10% probability of dying, regardless of its suitability.

169           We built a species x species co-occurrence matrix from the composition after the final cycle, and  
170 then estimated probabilistic dark diversity for each plot using three different co-occurrence based  
171 methods: the Beals index, Favorability, and the newly developed Hypergeometric method. We provide  
172 the functions for each of these processes, as well as the code used for the simulations in Appendix 1.

173

174           **Probabilistic estimations of dark diversity**

175

176           HYPERGEOMETRIC METHOD

177 The premise of the hypergeometric method is simple: for each pair of species we can compare  
 178 their realised number of co-occurrences with random expectations (i.e. if there was no association  
 179 between species). Let us consider two species  $i$  and  $j$ ; the probability that they co-occur in a number of  
 180 sites  $M$  is given by the mass function of the hypergeometric distribution (Griffith et al., 2016; Veech,  
 181 2013):

$$182 \quad P_{ij=M} = \frac{\binom{n_i}{M} \binom{N-n_i}{n_j-M}}{\binom{N}{n_j}},$$

183 where  $n_i$  and  $n_j$  are the total number of occurrences of species  $i$  and  $j$ , respectively, and  $N$  is the  
 184 total number of sites sampled. The mean of this distribution ( $\overline{M}_{ij}$ ) denotes the expected number of co-  
 185 occurrences between species  $i$  and  $j$  is given by:

$$186 \quad \overline{M}_{ij} = \frac{n_i n_j}{N}$$

187 Logically, if the number of actual co-occurrences is greater than expected by chance, the two  
 188 species are positively associated, and vice versa. We can estimate this departure from expected (ES,  
 189 effect size) simply by subtracting  $\overline{M}$  to  $M$ :

$$190 \quad ES_{ij} = M_{ij} - \overline{M}_{ij}$$

191  $ES$ , however does not convey information on the strength of the association (or lack thereof)  
 192 between two species. For this, we can estimate standardized effect sizes (SES) by dividing the effect  
 193 size by the square root of the variance of the hypergeometric distribution (the standard deviation):

$$194 \quad Var_{ij} = \left(\frac{n_i n_j}{N}\right) \left(\frac{N-n_i}{N}\right) \left(\frac{N-n_j}{N-1}\right)$$

$$195 \quad SES_{ij} = \frac{Effect\ size}{\sqrt{Var_{ij}}}$$

196 SES indicates how many standard deviations the observed number of co-occurrences is from the  
 197 expected value. They can then be expressed as probabilities ( $P_{ij}$ ) by confronting the SES value with the  
 198 cumulative normal distribution function with mean=0 and standard deviation=1. Probabilities close to  
 199 1 indicate that the two species are positively associated, whereas probabilities close to 0 indicate that  
 200 the two species are negatively associated; intermediate values denote a random association. This  
 201 procedure can be applied to all pairs of species to build a symmetric indication matrix reflecting the  
 202 strength of the association between all species pairs. The indication matrix can then be used to predict  
 203 the probabilistic dark diversity of a given site ( $k$ ) for which we know the observed diversity. This  
 204 probability can be estimated for each of the absent species in the site (i.e. all species in the dataset that  
 205 were not present in the site) simply by averaging the indication values of the species actually present in  
 206 the community:

$$207 \quad P_{ki} = \frac{1}{S_k} \sum_{j \neq i}^S P_{ij} I_{kj},$$

208 where  $S_k$  is the total number of species found in site  $k$ ,  $I_{kj}$  reflects the incidence (0, 1) of the  
209 indicator species  $j$  in site  $k$ , and  $S$  is the total number of species in the region. Hence, the probability of  
210 an absent species belonging to the dark diversity of a site is high if it tends to have positive associations  
211 with those species that are present, and negative associations result in a low probability of membership.

212

### 213 BEALS INDEX

214 The Beals probability that a species  $i$  should be present in a site  $k$  ( $P_{ki}$ ) can be estimated following  
215 (Münzbergová & Herben, 2004):

216

$$217 \quad P_{ki} = \frac{1}{S_k - I_{ki}} \sum_{j \neq i}^S \frac{M_{ij} I_{kj}}{n_j},$$

218 where  $S_k$  is the total number of species found in site  $k$ ,  $I_{ki}$  and  $I_{kj}$  reflect the incidence (0, 1) of  
219 species  $i$  and  $j$  in site  $k$ , respectively,  $S$  is the total number of species in the region,  $M_{ij}$  is the number of  
220 co-occurrences between species  $i$  and  $j$ , and  $n_j$  is the total number of occurrences of species  $j$ ,  
221 considering all sites. The probabilities predicted by the Beals index are correlated with the frequency  
222 of the species in the considered dataset, which has led some authors to recommend setting a species-  
223 specific probability threshold, which effectively creates a binary index (Lewis et al., 2016;  
224 Münzbergová & Herben, 2004).

225

### 226 FAVORABILITY INDEX

227 An alternative that avoids thresholding and makes the probabilities independent of species frequency is  
228 the favorability index proposed by Real, Barbosa, & Vargas (2006):

$$229 \quad F_{ki} = \frac{\frac{P_{ki}}{(1 - P_{ki})}}{\frac{n_i}{N - n_i} + \frac{P_{ki}}{(1 - P_{ki})}},$$

230 where  $F_{ki}$  is the favorability of site  $k$  for species  $i$ ,  $P_{ki}$  is a probability index affected by the global  
231 frequency of the species (i.e. the Beals index in this case).

232

### 233 **Methods performance comparison**

234 The advantage of using simulations to test dark diversity methods is that information about the  
235 suitability of absent species in each plot is predetermined and can be compared to the probabilities  
236 obtained from each method. We designed different tests to compare specific aspects of the methods.

#### 237 TEST 1: CORRELATION WITH SUITABILITY AND BIAS

238 **Test rationale.** We predicted the probabilities of all the absent species from all the communities  
239 for each method. We then estimated the Pearson correlation coefficient between the suitability of the  
240 species in the communities and the probability obtained from each method. A good method should

241 exhibit a strong correlation, reflecting its ability to characterize the suitability of each species in each  
242 community. We also examined the accuracy of each method (closeness to the 1:1 line) by estimating  
243 their mean absolute error (MAE):

$$244 \quad MAE = \frac{1}{S * N} \sum_{k=1}^N \sum_{i=1}^S |y_{ki} - P_{ki}|,$$

245 where  $y_{ki}$  is the real value of suitability for species  $i$  in site  $k$  and  $P_{ki}$  is the probability assigned  
246 by each method.

247 **Test results.** Our results revealed that the Hypergeometric method exhibited the most desirable  
248 characteristics. First, it showed the strongest correlation with suitability (which is ultimately the goal of  
249 a method for detecting dark diversity), followed by the Favorability method (Fig. 1). By contrast, the  
250 Beals index presented a substantially weaker correlation. However, Favorability exhibited a narrow  
251 range of predicted probabilities, with most values close to 0.5, despite suitability values were evenly  
252 spread across the entire 0-1 range. This resulted in Favorability being the least accurate method in our  
253 tests (MAE = 0.25). By contrast, the Hypergeometric method showed a much wider range of predicted  
254 probabilities, and more accurate estimations of suitability (MAE = 0.17; Fig. 1).

255

## 256 TEST 2: PREDICTIVE ABILITY AND RELATIONSHIP WITH DATASET SIZE.

257 **Test rationale.** One potentially important aspect in comparing these methods is their sensitivity to the  
258 size of the dataset. Some methods may be more suitable for datasets containing many sites than those  
259 containing few sites. To examine this, we selected random subsets of varying size (from 5 to 95  
260 communities in intervals of 5) of the communities after the last simulation step. From these reduced  
261 datasets, we estimated the correlation between the probability obtained from each method to absent  
262 species and their suitability in communities (as in Test 1). We repeated this procedure 100 times for  
263 each size, attaining 100 values of the correlation for each size and method. We then examined how the  
264 correlation improved as a function of the size of the dataset for each method. For this, for each subset  
265 (i.e. each sample size), we performed a linear mixed model using the method as a fixed effects  
266 explanatory variable and each random subset (100 repetitions) as a random effect. We then performed  
267 Tukey post-hoc tests to detect differences among methods.

268 **Test results.** Our results showed that the Hypergeometric method performed best for most sample sizes  
269 (Fig. 2). The Favorability method outperformed the Hypergeometric method only with a sample size of  
270 5 communities, which is an unrealistically low value. The hypergeometric method's performance  
271 increased more rapidly than that of the other methods with increasing number of communities and was  
272 the superior method for all sampling sizes greater than 15 communities. Beals's predictive ability was  
273 inferior to Favorability's for all sample sizes (Fig. 2).

274

## 275 TEST 3: ESTIMATIONS OF DARK DIVERSITY SIZE



276 **Test rationale.** In some cases, it is interesting to characterize the size of dark diversity (i.e. its expected  
277 number of species). For this, the probabilities for all species in a given site can be added (Karger et al.,  
278 2016). This approach considers our level of certainty about species membership in dark diversity:  
279 species with low probabilities will count little towards the total dark diversity size, whereas species with  
280 high probabilities will contribute greatly. Using the data from the last simulation, we tested the  
281 relationship between the size of dark diversity predicted by each method and the sum of the suitability  
282 of the absent species in each community. As in Test 1, we also estimated MAE to assess the accuracy  
283 of each method.

284 **Test results.** The size of dark diversity based on the Beals index had a non-significant correlation with  
285 the size of dark diversity based on suitability ( $p = 0.485$ ; Fig. 3). By contrast, both the Favorability and  
286 the Hypergeometric methods exhibited positive relationships between the predicted size of dark  
287 diversity and the size of dark diversity based on suitability, with similar predictive ability ( $p < 0.001$  in  
288 both cases; Fig. 3). However, the sizes of dark diversity estimated with the hypergeometric method  
289 were much more similar to those based on suitability (59.3% reduction in MAE), whereas sizes based  
290 on suitability were always overestimated.

291

#### 292 TEST 4: CORRELATION BETWEEN PREDICTIONS AND SPECIES REGIONAL FREQUENCY

293 **Test rationale.** Finally, we explored the effect of species regional frequency on the values that each  
294 method predicts. The predictions of a method that simply reflects species frequency will be biased  
295 (greater probabilities for more frequent species), and not satisfying the original definition of dark  
296 diversity, which does not depend on species regional frequency, but rather on their ecological  
297 requirements. To explore this, we estimated the correlation between the probability obtained for species  
298 not observed in the community and the frequency of species in the dataset (number of communities in  
299 which a species was found). Ideally, suitable methods to estimate probabilistic dark diversity should  
300 not show strong correlations between these two variables.

301 **Test results.** The predictions of the Beals index showed an extremely strong positive correlation with  
302 species regional frequency (Fig. 4). The other two indices also showed positive (but notably weaker)  
303 correlations with regional frequency. Favorability, in principle designed to mitigate this correlation,  
304 exhibited the weakest correlation, whereas the Hypergeometric method predictions were the least  
305 affected by the regional frequency of species (Fig. 4).

306

#### 307 *Real data example.*

308 We applied the three methods in two vegetation datasets with a nested hierarchical sampling  
309 design. The first dataset was a systematic sample of Swiss forests (“Swiss dataset”; Wohlgemuth,  
310 Moser, Brändli, Kull, & Schütz, 2008), with species recorded in 707 sites at two nested scales (30 m<sup>2</sup>  
311 and 500 m<sup>2</sup>), with a total of 772 species. The second dataset contained coastal grassland vegetation from  
312 Scotland (“Scottish dataset”; Shaw, Hewett, & Pizzey, 1983), encompassing 3033 sites and 465 species.

313 Species identities were also recorded at two nested scales (4 m<sup>2</sup> and 200 m<sup>2</sup>). Following Lewis et al.  
314 (2015), we built species x species co-occurrence matrices in the smaller plots, and then estimated  
315 probabilistic dark diversity using the three different probabilistic co-occurrence based methods.

316 Similarly to Test 1 for the simulated dataset, we explored the probabilities obtained from each  
317 method for all species in all communities. We also compared the probabilities that each method assigned  
318 to species designated as “Absent” (species present in neither nested plots), as “Dark” (species absent  
319 from the small plot but present in the large plot), and “Observed” (species present in the small plot).  
320 Finally, as in Test 4 for the simulated dataset, we explored the correlation between the values predicted  
321 by each method and the frequency of the species in the region.

322 In these datasets, both the Hypergeometric and the Favorability methods predicted probabilities  
323 encompassing the whole 0-1 range, with average predictions being around 0.4 for both methods. By  
324 contrast, the raw Beals index predicted extremely low probabilities on average (Fig. 5). This behaviour  
325 reflects the effect of regional frequency in the Beals raw index; this effect was absent in the favorability  
326 correction, which should reflect deviations from the general frequency of species (thus being higher for  
327 sites where the conditions are better suited for the species; Real et al. 2017). The distribution of  
328 Favorability probabilities was bimodal, with one peak of probabilities equal to 0, much more marked  
329 in the Scottish dataset (30.3% of the predicted probabilities in the Scottish dataset and 12.7% in the  
330 Swiss dataset were exactly 0), and the second peak resembling a normal distribution centred around  
331 0.5. This bimodality was caused by the great number of rare species occurring only in one or two sites,  
332 which generally are assigned a 0 probability in the Beals index method, and which is maintained in the  
333 Favorability method. By contrast, the Hypergeometric method assigned to these species in most cases  
334 a probability slightly less than 0.5. The Hypergeometric method produces probabilities near 0.5 in two  
335 situations: from a genuine lack of association among species, or from a lack of information due to the  
336 species having low frequency (or theoretically high frequency). The latter restricts the number of ways  
337 in which species can co-occur (two species with only one appearance each in a dataset can co-occur in  
338 one site), and hence departures from random co-occurrences can never be large. Values close to 0.5  
339 effectively express a lack of information on the ecological requirements of rare species, which can be  
340 considered an advantage of the Hypergeometric method. All methods worked similarly well in  
341 assigning ordered probabilities to species according to their status, with each method assigning the  
342 lowest probabilities to absent species and the highest probabilities to present species.

343 Similarly to the results of Test 4, the correlation between predictions of the Beals index and the  
344 regional frequency of species were extremely high (Fig. 6). In contrast with the simulated dataset, the  
345 Hypergeometric method—not Favorability—exhibited the weakest correlation, particularly in the  
346 Scottish dataset (Fig. 6), probably due to the aforementioned effect of rare species on Favorability  
347 predictions. Examination of the relationship between the frequency of the species and its average  
348 probability for the Hypergeometric method revealed probabilities close to 0.5 for the least frequent  
349 species, with the predictions becoming more variable as frequency increased.

350

351 **Discussion**

352 With this study we aimed to advance the development of probabilistic methods to estimate dark  
353 diversity (the absent part of the site-specific species pool) using species co-occurrences. By linking  
354 local and regional scales, dark diversity can help us to understand better biodiversity and its dynamics  
355 (Pärtel, Bennett, & Zobel, 2016). However, unlike observed diversity, dark diversity is not directly  
356 measurable, and depends on algorithmic estimation. Here, we presented a fully probabilistic method to  
357 estimate dark diversity using the co-occurrence matrix of species based on the hypergeometric  
358 distribution (Griffith et al., 2016). We compared its performance with other two extant methods based  
359 on species co-occurrences (Beals and Favorability) using simulations that include information on the  
360 ecological affinities of species within communities (suitability). By considering several criteria  
361 (distribution of predicted probabilities, predictive ability, and estimations of dark diversity size) we  
362 found that, although Favorability was generally superior than Beals, the Hypergeometric method  
363 performed better than the two other probabilistic methods. Further, we compared the results obtained  
364 from each method in two real datasets, showing that the positive features of the Hypergeometric method  
365 are also apparent in real-world applications.

366 The fact that dark diversity cannot be observed directly has two important implications. First, by  
367 acknowledging this lack of determinism, probabilistic approaches are particularly attractive alternatives  
368 to estimate dark diversity (Real et al., 2017). Despite insurances that dark diversity should be estimated  
369 probabilistically have accompanied the concept since its inception (Mokany & Paine, 2011), only  
370 recently have such approaches been adopted (Brown et al., 2019; de Bello et al., 2016; Karger et al.,  
371 2016; Lessard et al., 2016). Second, measuring dark diversity poses a methodological challenge, since  
372 there are no appropriate benchmarks to compare methods. Previous tests of dark diversity estimation  
373 methods have used nested datasets or repeated sampling in order to “observe” dark diversity (Brown et  
374 al., 2019; de Bello et al., 2016; Karger et al., 2016; Lewis et al., 2016). These studies have frequently  
375 found that Beals is the most suitable method. Although some of these studies acknowledge the  
376 imperfection of these tests because only an unknown portion of the true dark diversity is observed  
377 (Brown et al., 2019), the observed part of dark diversity is non-random. This is because species that are  
378 found in the observed portion of the dark diversity of a site are likely to be not only ecologically suitable,  
379 but also to have a greater frequency in the region (De Cáceres & Legendre, 2008; Real et al., 2017).  
380 Although many highly suitable species might be absent due to dispersal limitation (Riibak et al., 2015;  
381 Zobel, 2016), species with high frequency in the region may have also a high availability of propagules  
382 and can be present in less suitable sites due to source-sink dynamics (Pulliam, 2000). As a consequence,  
383 using nested or resampled datasets to calibrate and compare methods to estimate dark diversity can lead  
384 to biased results favouring indices—such as the Beals index—that predict greater probabilities for the  
385 most frequent species. Although the Beals index is a good predictor of the probability of occurrence of  
386 the target species (De Cáceres & Legendre, 2008), it is not necessarily a good predictor of their

387 suitability in a given site. At this point it is important to consider that—despite the different definitions  
388 attributed to “species pool” (Zobel, 2016)—dark diversity refers to those species that are absent from a  
389 site despite suitable ecological conditions (Pärtel et al., 2011). According to this criteria, our simulations  
390 revealed that Beals was clearly outperformed by the two other methods in terms of its ability to estimate  
391 suitability and dark diversity size. Consequently, while we agree that the raw Beals index can be useful  
392 for predicting which species will be observed as we increase sampling effort (either in space or in time;  
393 Karger et al., 2016), this is largely because it serves as a very good proxy of species general frequency,  
394 and more frequent species are found more often. However, we recommend that future studies estimating  
395 species adscription to dark diversity should focus on the ecological affinities of species, rather than on  
396 predicting occurrences in space or time.

397 Favorability and Hypergeometric methods are less affected by species frequency, and better  
398 indicators of the site suitability. Favorability, based on a correction of Beals to remove the effect of  
399 species frequency (Real et al., 2017), predicted species suitability and dark diversity size in our  
400 simulations better than Beals. However, the method was not completely free from the effect of species  
401 frequency in the region, since it assigned 0 probability to species for which there was no information  
402 (i.e. none of the species recorded in the site had co-occurred with the target species), which tended to  
403 be extremely rare species. Such extreme predictions for species with little information is not what one  
404 would expect if probabilities of adscription to dark diversity reflect the suitability of species in a site.  
405 This is not an issue of the Favorability transformation itself, but is inherited from the fact that the Beals  
406 index can result in probabilities of exactly 0. By contrast, the Hypergeometric method assigned  
407 probabilities close to 0.5 in these rare species, thereby expressing better the lack of available  
408 information: whether to include very infrequent species in dark diversity is akin to coin flipping,  
409 whereas more confident predictions can be made for common species. In fact, the Hypergeometric  
410 method is most reliable for pairs of species with intermediate incidence (Lavender, Schamp, Arnott, &  
411 Rusak, 2019). In any case, the Hypergeometric method outperformed Favorability in all considered  
412 aspects of our simulations. Although all methods proved capable of discriminating between observed  
413 and non-observed species, the distribution of probabilities of the Hypergeometric method exhibited the  
414 most appropriate shape, encompassing the whole range of available probability. Moreover, it was the  
415 best method for predicting the ecological affinity of species for all reasonably sized datasets. It was also  
416 the best calibrated method, returning unbiased predictions of both suitability and dark diversity size. In  
417 addition, it exhibited positive features in real datasets, including the aforementioned lack of extreme  
418 predictions, a good ability to resolve between absent and present species, and a reasonable relationship  
419 between predicted probabilities and species frequency. As a consequence, we conclude that the  
420 Hypergeometric method is currently the most promising method to estimate probabilistic dark diversity  
421 and species pool composition based on co-occurrences.

422 **Conclusions**

423           Methods based on species co-occurrence patterns have proven to be a powerful tool to estimate  
424 probabilistic dark diversity. They integrate information on abiotic and abiotic conditions, which makes  
425 them good at characterizing the realized niches of species (Lewis et al., 2016). Most importantly,  
426 information on species co-occurrences is increasingly available in a wide range of environments and  
427 regions, which should allow us to improve estimation of species pairwise associations. An important  
428 aspect to consider is that correct characterizations of dark diversity based on species co-occurrences  
429 require reliable and complete sampling of the species that are present. This can be challenging for sites  
430 containing many elusive or inconspicuous species (Boussarie et al., 2018). On the other hand,  
431 estimations of probabilistic methods might help to improve assessment of observed diversity by  
432 indicating apparently absent species with a high probability of having eluded detection. Among the  
433 methods considered here, existing evidence suggests that the Hypergeometric method is the most  
434 suitable to detect pairwise associations among species (Lavender et al., 2019). However, species do not  
435 occur in pairs, but form diverse interacting networks, so that restricting our analyses to pairwise co-  
436 occurrences is likely neglecting substantial amounts of ecological information. Future methods to  
437 estimate probabilistic dark diversity would benefit greatly from co-occurrence based methods that look  
438 beyond associations between pairs of species. Considering biodiversity from a probabilistic point of  
439 view is a meaningful way to acknowledge the uncertainty associated with ecological information. The  
440 development of probabilistic dark diversity joins similar advances made in functional diversity  
441 (Carmona, de Bello, Mason, & Leps, 2016). Future integration of probabilistic species pools and  
442 functional diversity will advance our understanding of assembly processes and conservation status of  
443 ecological systems at multiple spatial and temporal scales. In order to help ecologists implement all the  
444 methods shown here, we have developed the ‘DarkDiv’ R package (Carmona, 2019; freely available in  
445 <https://CRAN.R-project.org/package=DarkDiv>).

446

## 447           **REFERENCES**

- 448 Beals, E. . (1984). Bray-Curtis Ordination: An Effective Strategy for Analysis of Multivariate  
449 Ecological Data. *Advances in Ecological Research*, 14, 1–55. doi:10.1016/S0065-  
450 2504(08)60168-3
- 451 Bennett, J. A., & Pärtel, M. (2017). Predicting species establishment using absent species and  
452 functional neighborhoods. *Ecology and Evolution*, 7(7), 2223–2237. doi:10.1002/ece3.2804
- 453 Boussarie, G., Bakker, J., Wangenstein, O. S., Mariani, S., Bonnin, L., Juhel, J. B., ... Mouillot, D.  
454 (2018). Environmental DNA illuminates the dark diversity of sharks. *Science Advances*, 4(5),  
455 eaap9661. doi:10.1126/sciadv.aap9661
- 456 Brown, J. J., Mennicken, S., Massante, J. C., Dijoux, S., Telea, A., Benedek, A. M., ... de Bello, F.  
457 (2019). A novel method to predict dark diversity using unconstrained ordination analysis.  
458 *Journal of Vegetation Science*, in press. doi:10.1111/jvs.12757
- 459 Carmona, C. P. (2019). DarkDiv: Estimating Probabilistic Dark Diversity. Retrieved from

- 460 <https://cran.r-project.org/package=DarkDiv>
- 461 Carmona, C. P., de Bello, F., Mason, N. W. H., & Leps, J. (2016). Traits Without Borders :  
462 Integrating Functional Diversity Across Scales. *Trends in Ecology & Evolution*, *31*(5), 382–394.  
463 doi:10.1016/j.tree.2016.02.003
- 464 de Bello, F., Fibich, P., Zelený, D., Kopecký, M., Mudrak, O., Chytry, M., ... Partel, M. (2016).  
465 Measuring size and composition of species pools: a comparison of dark diversity estimates.  
466 *Ecology and Evolution*, *6*(12), 4088–4101. doi:10.1002/ece3.2169
- 467 de Bello, F., Price, J. N., Munkemuller, T., Liira, J., Zobel, M., Thuiller, W., ... Partel, M. (2012).  
468 Functional species pool framework to test for biotic effects on community assembly. *Ecology*,  
469 *93*(10), 2263–2273. doi:10.1890/11-1394.1
- 470 De Caceres, M., & Legendre, P. (2008). Beals smoothing revisited. *Oecologia*, *156*(3), 657–669.  
471 doi:10.1007/s00442-008-1017-y
- 472 Estrada, A., Barbosa, A. M., & Real, R. (2018). Changes in potential mammal diversity in national  
473 parks and their implications for conservation. *Current Zoology*, *21*(6), 213–251.  
474 doi:10.1093/cz/zoy001
- 475 Ewald, J. (2002). A probabilistic approach to estimating species pools from large compositional  
476 matrices. *Journal of Vegetation Science*, *13*(2), 191–198. doi:10.1111/j.1654-  
477 1103.2002.tb02039.x
- 478 Griffith, D. M., Veech, J. A., & Marsh, C. J. (2016). **cooccur** : Probabilistic Species Co-Occurrence  
479 Analysis in R. *Journal of Statistical Software*, *69*(Code Snippet 2), 1–17.  
480 doi:10.18637/jss.v069.c02
- 481 Jimenez-Alfaro, B., Girardello, M., Chytry, M., Svenning, J. C., Willner, W., Gegout, J. C., ...  
482 Wohlgemuth, T. (2018). History and environment shape species pools and community diversity  
483 in European beech forests. *Nature Ecology and Evolution*, *2*(3), 483–490. doi:10.1038/s41559-  
484 017-0462-6
- 485 Joks, M., & Partel, M. (2019). Plant diversity in Oceanic archipelagos: realistic patterns emulated by  
486 an agent-based computer simulation. *Ecography*, *42*(4), 740–754. doi:10.1111/ecog.03985
- 487 Karger, D. N., Cord, A. F., Kessler, M., Kreft, H., Kuhn, I., Pompe, S., ... Wesche, K. (2016).  
488 Delineating probabilistic species pools in ecology and biogeography. *Global Ecology and*  
489 *Biogeography*, *25*(4), 489–501. doi:10.1111/geb.12422
- 490 Lavender, T. M., Schamp, B. S., Arnott, S. E., & Rusak, J. A. (2019). A comparative evaluation of  
491 five common pairwise tests of species association. *Ecology*, *100*(4), e02640.  
492 doi:10.1002/ecy.2640
- 493 Lessard, J.-P., Weinstein, B. G., Borregaard, M. K., Marske, K. A., Martin, D. R., McGuire, J. A., ...  
494 Graham, C. H. (2016). Process-Based Species Pools Reveal the Hidden Signature of Biotic  
495 Interactions Amid the Influence of Temperature Filtering. *The American Naturalist*, *187*(1), 75–  
496 88. doi:10.1086/684128

- 497 Lewis, R. J., de Bello, F., Bennett, J. A., Fibich, P., Finerty, G. E., Götzenberger, L., ... Pärtel, M.  
498 (2017). Applying the dark diversity concept to nature conservation. *Conservation Biology*,  
499 31(1), 40–47. doi:10.1017/CBO9781107415324.004
- 500 Lewis, R. J., Szava-Kovats, R., & Pärtel, M. (2016). Estimating dark diversity and species pools: an  
501 empirical assessment of two methods. *Methods in Ecology and Evolution*, 7, 104–113.  
502 doi:10.1111/2041-210X.12443
- 503 Mokany, K., & Paine, D. R. (2011). Dark diversity: adding the grey. *Trends in Ecology & Evolution*,  
504 26(6), 264–5; author reply 265–6. doi:10.1016/j.tree.2011.03.009
- 505 Münzbergová, Z., & Herben, T. (2004). Identification of suitable unoccupied habitats in  
506 metapopulation studies using co-occurrence of species. *Oikos*, 105(2), 408–414.  
507 doi:10.1111/j.0030-1299.2004.13017.x
- 508 Olivero, J., Fa, J. E., Real, R., Márquez, A. L., Farfán, M. A., Vargas, J. M., ... Nasi, R. (2017).  
509 Recent loss of closed forests is associated with Ebola virus disease outbreaks. *Scientific Reports*,  
510 7(1), 1–9. doi:10.1038/s41598-017-14727-9
- 511 Pärtel, M., Bennett, J. A., & Zobel, M. (2016). Macroecology of biodiversity: disentangling local and  
512 regional effects. *New Phytologist*, 211(2), 404–410. doi:10.1111/nph.13943
- 513 Pärtel, M., Szava-Kovats, R., & Zobel, M. (2011). Dark diversity: Shedding light on absent species.  
514 *Trends in Ecology and Evolution*, 26(3), 124–128. doi:10.1016/j.tree.2010.12.004
- 515 Pärtel, M., Zobel, M., Zobel, K., & van der Maarel, E. (1996). The Species Pool and Its Relation to  
516 Species Richness: Evidence from Estonian Plant Communities. *Oikos*, 75(1), 111–117.  
517 doi:10.2307/3546327
- 518 Pulliam, H. R. (2000). On the relationship between niche and distribution. *Ecology Letters*, 3(4), 349–  
519 361. doi:10.1046/j.1461-0248.2000.00143.x
- 520 Real, R., Barbosa, A. M., & Vargas, J. M. (2006). Obtaining environmental favourability functions  
521 from logistic regression. *Environmental and Ecological Statistics*, 13(2), 237–245.  
522 doi:10.1007/s10651-005-0003-3
- 523 Real, R., Márcia Barbosa, A., & Bull, J. W. (2017). Species distributions, quantum theory, and the  
524 enhancement of biodiversity measures. *Systematic Biology*, 66(3), 453–462.  
525 doi:10.1093/sysbio/syw072
- 526 Riibak, K., Reitalu, T., Tamme, R., Helm, A., Gerhold, P., Znamenskiy, S., ... Pärtel, M. (2015). Dark  
527 diversity in dry calcareous grasslands is determined by dispersal ability and stress-tolerance.  
528 *Ecography*, 38(7), 713–721. doi:10.1111/ecog.01312
- 529 Ronk, A., de Bello, F., Fibich, P., & Pärtel, M. (2016). Large-scale dark diversity estimates: new  
530 perspectives with combined methods. *Ecology and Evolution*, 6(17), 6266–6281.  
531 doi:10.1002/ece3.2371
- 532 Shaw, M. W., Hewett, D. G., & Pizzey, J. M. (1983). *Scottish Coastal Survey*. Bangor, Gwynedd.:  
533 Institute of Terrestrial Ecology. Bangor Research Station.

- 534 Veech, J. A. (2013). A probabilistic model for analysing species co-occurrence. *Global Ecology and*  
535 *Biogeography*, 22(2), 252–260. doi:10.1111/j.1466-8238.2012.00789.x
- 536 Vellend, M. (2010). Conceptual synthesis in community ecology. *The Quarterly Review of Biology*,  
537 85(2), 183–206. doi:10.1086/652373
- 538 Wohlgemuth, T., Moser, B., Brändli, U. B., Kull, P., & Schütz, M. (2008). Diversity of forest plant  
539 species at the community and landscape scales in Switzerland. *Plant Biosystems*, 142(3), 604–  
540 613. doi:10.1080/11263500802410975
- 541 Zobel, M. (2016). The species pool concept as a framework for studying patterns of plant diversity.  
542 *Journal of Vegetation Science*, 27(1), 8–18. doi:10.1111/jvs.12333
- 543
- 544



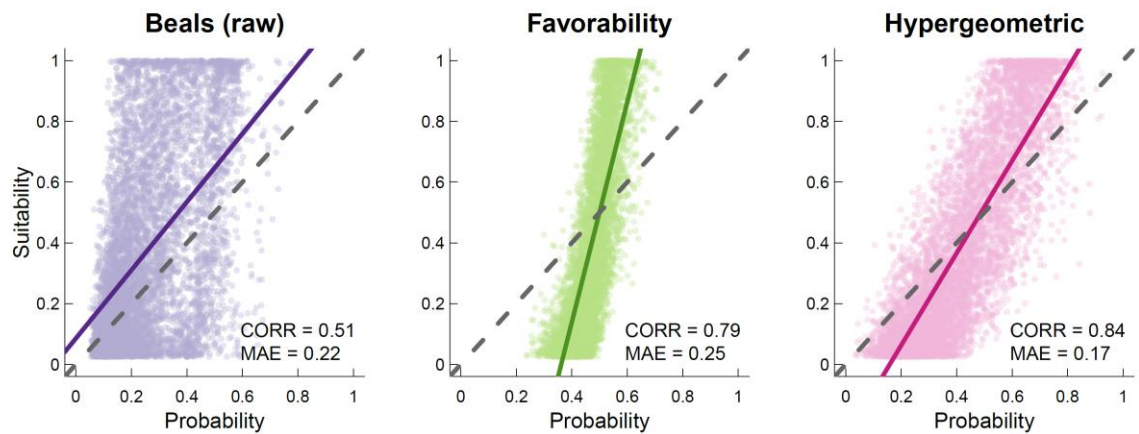

545

546 **Fig. 1.** Relationship between the probabilities assigned by each method to the species absent  
547 from each community and their suitability in each community. Continuous coloured lines indicate the  
548 fit of a linear model between the two variables and the dashed line indicates a 1:1 relationship. Pearson  
549 correlation coefficient and mean absolute error (MAE; indicating closeness to the 1:1 line) are shown  
550 in each plot.

551

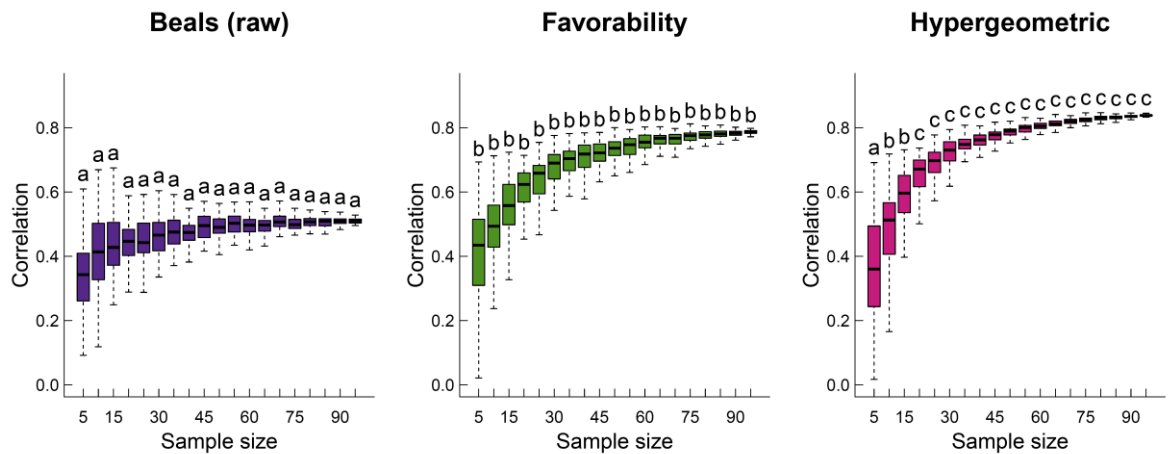

552

553 **Fig. 2.** Predictive ability of the different methods as a function of sample size. Each plot shows  
554 how the correlation (Pearson) between the suitability of absent species in each plot and the  
555 probabilistic value given by each method varies as the number of plots increased (see main text for  
556 further explanations). Letters above each boxplot show differences in a Tukey post-hoc test ( $\alpha=0.05$ )  
557 comparing methods within the same sample size, considering each random repetition as a random  
558 factor.

559

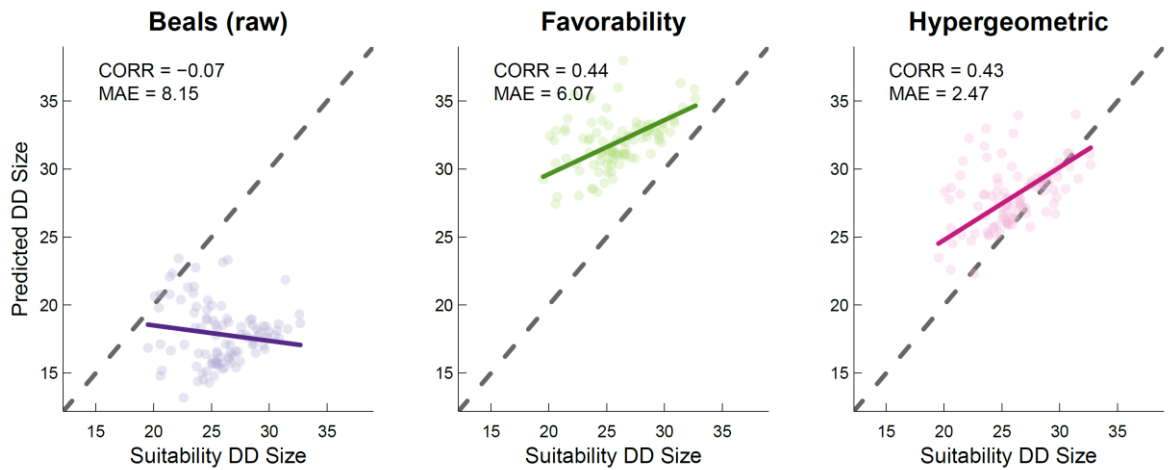

560

561

562

563

564

565

566

**Fig. 3.** Relationship between the size of dark diversity predicted by each method and the true size of dark diversity according to the summed suitability of absent species in each community. Continuous coloured lines indicate the fit of a linear model between the two variables and the dashed line indicates a 1:1 relationship. Pearson correlation coefficient and mean absolute error (MAE; indicating closeness to the 1:1 line) are shown in each plot.

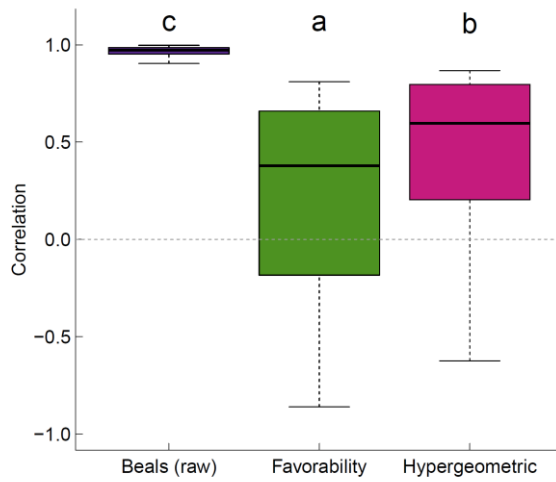

567

568

569

570

571

**Fig. 4.** Correlation (Pearson) between the probabilities predicted by each method for the absent species from each site and the regional frequency of species in the simulated dataset. Letters above each boxplot show differences in a Tukey post-hoc test ( $\alpha=0.05$ ) comparing methods.

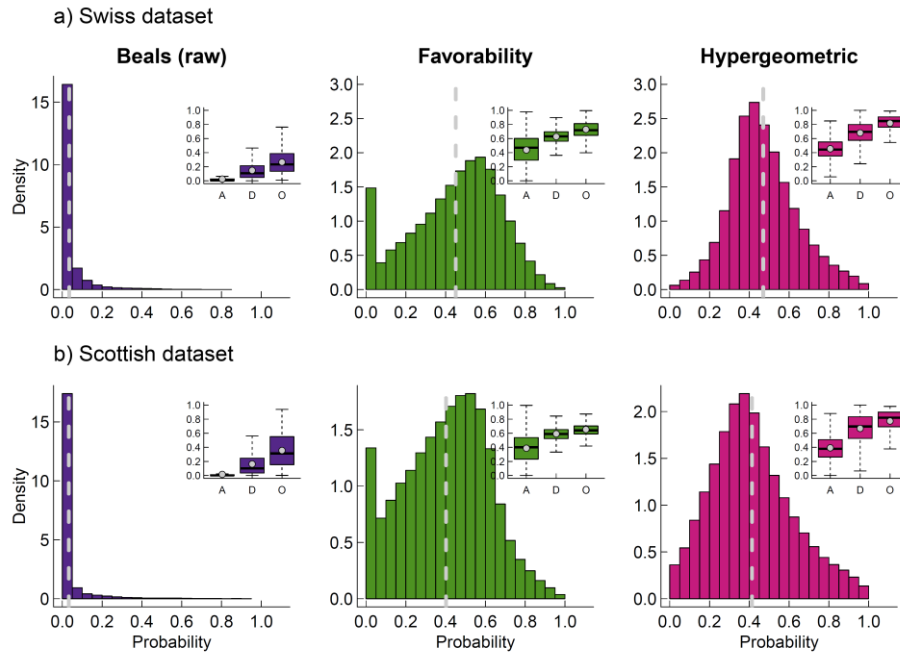

572

573 **Fig. 5.** Distribution of the probabilities obtained from each method, considering all species in  
574 all the sites of each dataset. The grey dashed line indicate the average probability of each method in  
575 each dataset. The subplots show the different probabilities obtained from each method in each dataset  
576 to species categorized as “absent” (A; species not found in the considered site at any scale), “dark”  
577 (D; species found in the large plot, but not in the small one) and “observed” (O; species found in the  
578 small plot).

579

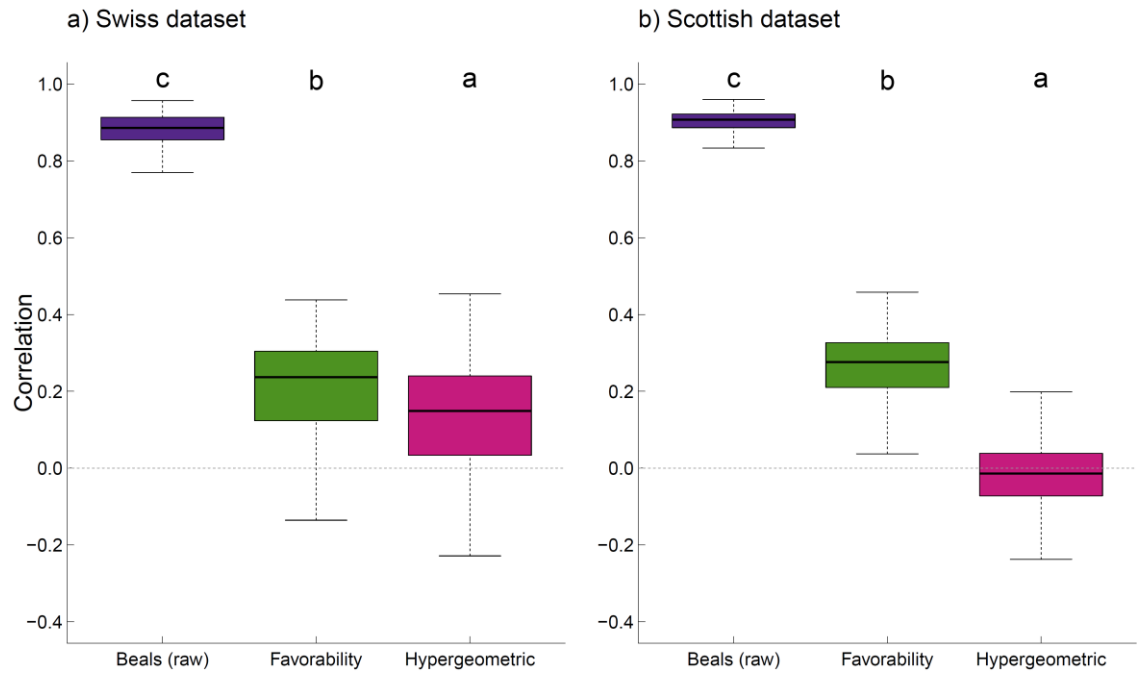

580

581 **Fig. 6.** Correlation (Pearson) between the probabilities predicted by each method for the absent

582 species from each site and regional frequency of species in the real datasets. Letters above each boxplot

583 show differences in a Tukey post-hoc test ( $\alpha=0.05$ ) comparing methods.

584
